# Supplementary material for: Grape Pomace for Topical Application: Green NaDES Sustainable Extraction, Skin Permeation Studies, Antioxidant and Anti-Inflammatory Activities Characterization in 3D Human Keratinocytes
Source: MDPI journal article supplement (doi:10.3390/biom11081181), 2021-08-10
Supplement: s1 [file s1]

# Supplementary Material

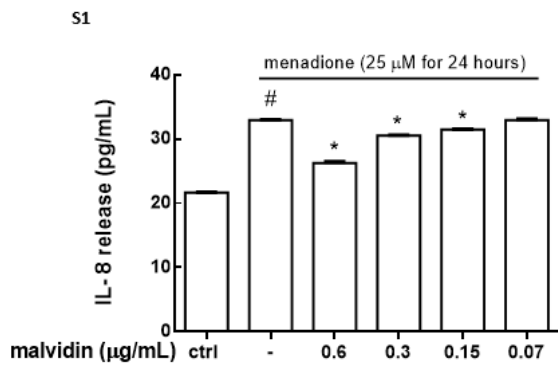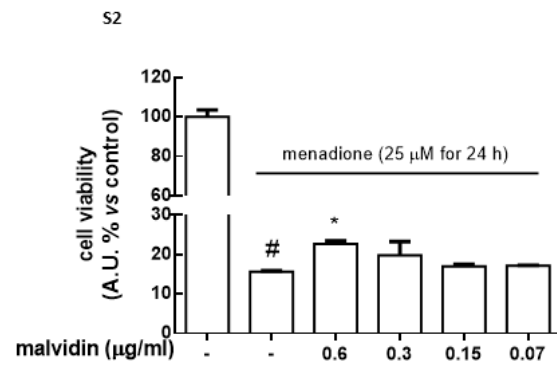

**Supplementary Figures.** HaCat spheroids were treated for 24 h with malvidin (range 0.07 – 0.6  $\mu$ g mL<sup>-1</sup>) dissolved in BET-CA vehicle, in the presence of menadione (25  $\mu$ M) for 16 h. 1) Release of the proinflammatory cytokine IL-8 (pg mL<sup>-1</sup>) was determined by ELISA assay. 2) Cell viability was measured by cell counting kit-8 as described in Materials and Methods Section. HaCat spheroids not treated served as a control (ctrl). Results are expressed as mean  $\pm$  SD of three independent experiments, each performed in triplicate. \*P<0.05, \*\*\*P<0.001 significantly different from menadione treatment; # P<0.001 significantly different from the ctrl.
